# Supplementary material for: Isolation and characterization of eight microsatellite loci from Galeocerdo cuvier (tiger shark) and cross-amplification in Carcharhinus leucas, Carcharhinus brevipinna, Carcharhinus plumbeus and Sphyrna lewini
Source: PeerJ. 2016 May 17;4:e2041. doi: 10.7717/peerj.2041 (PMC4878374; doi:10.7717/peerj.2041)
Supplement: Data S1 — Microsatellite data and sequences of the control region for individuals studied. (−) indicates no data [file peerj-04-2041-s001.xlsx]

## Sheet: raw data
Sample Name	Species	Gc01	Gc01	Gc02	Gc02	Gc03	Gc03	Gc04	Gc04	Gc05	Gc05	Gc06	Gc06	Gc07	Gc07	Gc08	Gc08	Control Region Sequence
GcRUN001	Galeocerdo cuvier	143	143	101	101	129	129	199	199	117	117	122	122	118	120	207	215	TTATAGTACGTAAAACCAAAAGTGAAAAATTTTGGTTTTTGTACGTCAGTATGACATATTAATGATATGGCCCACATATCCTAATATACCACATACAACCCTCATTCCCTGGGTTACTTTAACAGATAATCCCCTACAGTTTCACATATACTATGTTTAATACTCATTAATCGATATTCCCCTATATCATTACATACTATGTTTAATCCACATTAGTTTACTGTCAGCTATTTCATTACATTAAATTACTTAACCCTCATTAATCTATGATCAATATTTTCCATAGCATAATATTTTTCACTTAACCCTACTTTACATAGTATTAATCATGCCGTTGGTAAGAAATCACCAATAACCTCCTGAATGAAAAAAATTGTACGGTTTGTGGTACATTACTGT…
GcRUN002	Galeocerdo cuvier	143	143	101	101	121	129	199	199	117	117	122	122	118	122	207	207	TTATAGTACGTAAAACCAAAAGTGAAAAATTTTGGTTTTTGTACGTCAGTATGACATATTAATGATATGGCCCACATATCCTAATATACCACATACAACCCTCATTCCCTGGGTTACTTTAACAGATAATCCCCTACAGTTTCACATATACTATGTTTAATACTCATTAATCGATATTCCCCTATATCATTACATACTATGTTTAATCCACATTAGTTTACTGTCAGCTATTTCATTACATTAAATTACTTAACCCTCATTAATCTATGATCAATATTTTCCATAGCATAATATTTTTCACTTAACCCTACTTTACATAGTATTAATCATGCCGTTGGTAAGAAATCACCAATAACCTCCTGAATGAAAAAAATTGTACGGTTTGTGGTACATTACTGT…
GcRUN003	Galeocerdo cuvier	143	143	101	101	121	127	199	199	123	123	118	118	122	128	207	207	TTATAGTACGTAAAACCAAAAGTGAAAAATTTTGGTTTTTGTACGTCAGTATGACATATTAATGATATGGCCCACATATCCTAATATACCACATACAACCCTCATTCCCTGGGTTACTTTAACAGATAATCCCCTACAGTTTCACATATACTATGTTTAATACTCATTAATCGATATTCCCCTATATCATTACATACTATGTTTAATCCACATTAGTTTACTGTCAGCTATTTCATTACATTAAATTACTTAACCCTCATTAATCTATGATCAATATTTTCCATAGCATAATATTTTTCACTTAACCCTACTTTACATAGTATTAATCATGCCGTTGGTAAGAAATCACCAATAACCTCCTGAATGAAAAAAATTGTACGGTTTGTGGTACATTACTGT…
GcRUN004	Galeocerdo cuvier	143	143	101	101	127	127	195	195	117	117	122	122	116	120	207	207	TTATAGTACGTAAAACCAAAAGTGAAAAATTTTGGTTTTTGTACGTCAGTATGACATATTAATGATATGGCCCACATATCCTAATATACCACATACAACCCTCATTCCCTGGGTTACTTTAACAGATAATCCCCTACAGTTTCACATATACTATGTTTAATACTCATTAATCGATATTCCCCTATATCATTACATACTATGTTTAATCCACATTAGTTTACTGTCAGCTATTTCATTACATTAAATTACTTAACCCTCATTAATCTATGATCAATATTTTCCATAGCATAATATTTTTCACTTAACCCTACTTTACATAGTATTAATCATGCCGTTGGTAAGAAATCACCAATAACCTCCTGAATGAAAAAAATTGTACGGTTTGTGGTACATTACTGT…
GcRUN005	Galeocerdo cuvier	143	143	93	101	127	129	199	199	123	123	122	122	122	122	207	215	TTATAGTACGTAAAACCAAAAGTGAAAAATTTTGGTTTTTGTACGTCAGTATGACATATTAATGATATGGCCCACATATCCTAATATACCACATACAACCCTCATTCCCTGGGTTACTTTAACAGATAATCCCCTACAGTTTCACATATACTATGTTTAATACTCATTAATCGATATTCCCCTATATCATTACATACTATGTTTAATCCACATTAGTTTACTGTCAGCTATTTCATTACATTAAATTACTTAACCCTCATTAATCTATGATCAATATTTTCCATAGCATAATATTTTTCACTTAACCCTACTTTACATAGTATTAATCATGCCGTTGGTAAGAAATCACCAATAACCTCCTGAATGAAAAAAATTGTACGGTTTGTGGTACATTACTGT…
GcRUN006	Galeocerdo cuvier	143	147	101	101	127	129	199	199	123	123	122	122	114	120	207	215	TTATAGTACGTAAAACCAAAAGTGAAAAATTTTGGTTTTTGTACGTCAGTATGACATATTAATGATATGGCCCACATATCCTAATATACCACATACAACCCTCATTCCCTGGGTTACTTTAACAGATAATCCCCTACAGTTTCACATATACTATGTTTAATACTCATTAATCGATATTCCCCTATATCATTACATACTATGTTTAATCCACATTAGTTTACTGTCAGCTATTTCATTACATTAAATTACTTAACCCTCATTAATCTATGATCAATATTTTCCATAGCATAATATTTTTCACTTAACCCTACTTTACATAGTATTAATCATGCCGTTGGTAAGAAATCACCAATAACCTCCTGAATGAAAAAAATTGTACGGTTTGTGGTACATTACTGT…
GcRUN007	Galeocerdo cuvier	143	143	101	101	127	127	199	199	117	117	122	122	122	122	207	215	TTATAGTACGTAAAACCAAAAGTGAAAAATTTTGGTTTTTGTACGTCAGTATGACATATTAATGATATGGCCCACATATCCTAATATACCACATACAACCCTCATTCCCTGGGTTACTTTAACAGATAATCCCCTACAGTTTCACATATACTATGTTTAATACTCATTAATCGATATTCCCCTATATCATTACATACTATGTTTAATCCACATTAGTTTACTGTCAGCTATTTCATTACATTAAATTACTTAACCCTCATTAATCTATGATCAATATTTTCCATAGCATAATATTTTTCACTTAACCCTACTTTACATAGTATTAATCATGCCGTTGGTAAGAAATCACCAATAACCTCCTGAATGAAAAAAATTGTACGGTTTGTGGTACATTACTGT…
GcRUN008	Galeocerdo cuvier	143	143	101	101	121	129	195	199	117	117	122	122	118	122	207	207	TTATAGTACGTAAAACCAAAAGTGAAAAATTTTGGTTTTTGTACGTCAGTATGACATATTAATGATATGGCCCACATATCCTAATATACCACATACAACCCTCATTCCCTGGGTTACTTTAACAGATAATCCCCTACAGTTTCACATATACTATGTTTAATACTCATTAATCGATATTCCCCTATATCATTACATACTATGTTTAATCCACATTAGTTTACTGTCAGCTATTTCATTACATTAAATTACTTAACCCTCATTAATCTATGATCAATATTTTCCATAGCATAATATTTTTCACTTAACCCTACTTTACATAGTATTAATCATGCCGTTGGTAAGAAATCACCAATAACCTCCTGAATGAAAAAAATTGTACGGTTTGTGGTACATTACTGT…
GcRUN009	Galeocerdo cuvier	143	143	101	101	121	129	199	199	117	117	122	122	118	118	207	215	TTATAGTACGTAAAACCAAAAGTGAAAAATTTTGGTTTTTGTACGTCAGTATGACATATTAATGATATGGCCCACATATCCTAATATACCACATACAACCCTCATTCCCTGGGTTACTTTAACAGATAATCCCCTACAGTTTCACATATACTATGTTTAATACTCATTAATCGATATTCCCCTATATCATTACATACTATGTTTAATCCACATTAGTTTACTGTCAGCTATTTCATTACATTAAATTACTTAACCCTCATTAATCTATGATCAATATTTTCCATAGCATAATATTTTTCACTTAACCCTACTTTACATAGTATTAATCATGCCGTTGGTAAGAAATCACCAATAACCTCCTGAATGAAAAAAATTGTACGGTTTGTGGTACATTACTGT…
GcRUN010	Galeocerdo cuvier	143	143	93	101	127	129	199	199	117	123	122	122	118	122	207	219	TTATAGTACGTAAAACCAAAAGTGAAAAATTTTGGTTTTTGTACGTCAGTATGACATATTAATGATATGGCCCACATATCCTAATATACCACATACAACCCTCATTCCCTGGGTTACTTTAACAGATAATCCCCTACAGTTTCACATATACTATGTTTAATACTCATTAATCGATATTCCCCTATATCATTACATACTATGTTTAATCCACATTAGTTTACTGTCAGCTATTTCATTACATTAAATTACTTAACCCTCATTAATCTATGATCAATATTTTCCATAGCATAATATTTTTCACTTAACCCTACTTTACATAGTATTAATCATGCCGTTGGTAAGAAATCACCAATAACCTCCTGAATGAAAAAAATTGTACGGTTTGTGGTACATTACTGT…
GcRUN011	Galeocerdo cuvier	143	143	101	101	127	127	195	195	117	117	118	122	118	120	207	207	TTATAGTACGTAAAACCAAAAGTGAAAAATTTTGGTTTTTGTACGTCAGTATGACATATTAATGATATGGCCCACATATCCTAATATACCACATACAACCCTCATTCCCTGGGTTACTTTAACAGATAATCCCCTACAGTTTCACATATACTATGTTTAATACTCATTAATCGATATTCCCCTATATCATTACATACTATGTTTAATCCACATTAGTTTACTGTCAGCTATTTCATTACATTAAATTACTTAACCCTCATTAATCTATGATCAATATTTTCCATAGCATAATATTTTTCACTTAACCCTACTTTACATAGTATTAATCATGCCGTTGGTAAGAAATCACCAATAACCTCCTGAATGAAAAAAATTGTACGGTTTGTGGTACATTACTGT…
GcRUN012	Galeocerdo cuvier	143	143	101	101	121	129	199	199	117	123	122	122	114	122	207	215	TTATAGTACGTAAAACCAAAAGTGAAAAATTTTGGTTTTTGTACGTCAGTATGACATATTAATGATATGGCCCACATATCCTAATATACCACATACAACCCTCATTCCCTGGGTTACTTTAACAGATAATCCCCTACAGTTTCACATATACTATGTTTAATACTCATTAATCGATATTCCCCTATATCATTACATACTATGTTTAATCCACATTAGTTTACTGTCAGCTATTTCATTACATTAAATTACTTAACCCTCATTAATCTATGATCAATATTTTCCATAGCATAATATTTTTCACTTAACCCTACTTTACATAGTATTAATCATGCCGTTGGTAAGAAATCACCAATAACCTCCTGAATGAAAAAAATTGTACGGTTTGTGGTACATTACTGT…
GcRUN013	Galeocerdo cuvier	143	143	101	101	121	129	195	199	117	123	122	122	114	118	215	215	TTATAGTACGTAAAACCAAAAGTGAAAAATTTTGGTTTTTGTACGTCAGTATGACATATTAATGATATGGCCCACATATCCTAATATACCACATACAACCCTCATTCCCTGGGTTACTTTAACAGATAATCCCCTACAGTTTCACATATACTATGTTTAATACTCATTAATCGATATTCCCCTATATCATTACATACTATGTTTAATCCACATTAGTTTACTGTCAGCTATTTCATTACATTAAATTACTTAACCCTCATTAATCTATGATCAATATTTTCCATAGCATAATATTTTTCACTTAACCCTACTTTACATAGTATTAATCATGCCGTTGGTAAGAAATCACCAATAACCTCCTGAATGAAAAAAATTGTACGGTTTGTGGTACATTACTGT…
GcRUN014	Galeocerdo cuvier	143	143	101	101	121	127	195	199	117	123	122	122	116	122	207	207	TTATAGTACGTAAAACCAAAAGTGAAAAATTTTGGTTTTTGTACGTCAGTATGACATATTAATGATATGGCCCACATATCCTAATATACCACATACAACCCTCATTCCCTGGGTTACTTTAACAGATAATCCCCTACAGTTTCACATATACTATGTTTAATACTCATTAATCGATATTCCCCTATATCATTACATACTATGTTTAATCCACATTAGTTTACTGTCAGCTATTTCATTACATTAAATTACTTAACCCTCATTAATCTATGATCAATATTTTCCATAGCATAATATTTTTCACTTAACCCTACTTTACATAGTATTAATCATGCCGTTGGTAAGAAATCACCAATAACCTCCTGAATGAAAAAAATTGTACGGTTTGTGGTACATTACTGT…
GcRUN015	Galeocerdo cuvier	143	143	101	101	127	129	199	199	117	123	118	122	122	122	207	215	TTATAGTACGTAAAACCAAAAGTGAAAAATTTTGGTTTTTGTACGTCAGTATGACATATTAATGATATGGCCCACATATCCTAATATACCACATACAACCCTCATTCCCTGGGTTACTTTAACAGATAATCCCCTACAGTTTCACATATACTATGTTTAATACTCATTAATCGATATTCCCCTATATCATTACATACTATGTTTAATCCACATTAGTTTACTGTCAGCTATTTCATTACATTAAATTACTTAACCCTCATTAATCTATGATCAATATTTTCCATAGCATAATATTTTTCACTTAACCCTACTTTACATAGTATTAATCATGCCGTTGGTAAGAAATCACCAATAACCTCCTGAATGAAAAAAATTGTACGGTTTGTGGTACATTACTGT…
GcRUN016	Galeocerdo cuvier	143	143	101	101	121	127	195	195	117	123	122	122	116	118	207	207	TTATAGTACGTAAAACCAAAAGTGAAAAATTTTGGTTTTTGTACGTCAGTATGACATATTAATGATATGGCCCACATATCCTAATATACCACATACAACCCTCATTCCCTGGGTTACTTTAACAGATAATCCCCTACAGTTTCACATATACTATGTTTAATACTCATTAATCGATATTCCCCTATATCATTACATACTATGTTTAATCCACATTAGTTTACTGTCAGCTATTTCATTACATTAAATTACTTAACCCTCATTAATCTATGATCAATATTTTCCATAGCATAATATTTTTCACTTAACCCTACTTTACATAGTATTAATCATGCCGTTGGTAAGAAATCACCAATAACCTCCTGAATGAAAAAAATTGTACGGTTTGTGGTACATTACTGT…
GcRUN017	Galeocerdo cuvier	143	143	101	101	127	127	199	199	123	123	122	122	116	118	207	215	TTATAGTACGTAAAACCAAAAGTGAAAAATTTTGGTTTTTGTACGTCAGTATGACATATTAATGATATGGCCCACATATCCTAATATACCACATACAACCCTCATTCCCTGGGTTACTTTAACAGATAATCCCCTACAGTTTCACATATACTATGTTTAATACTCATTAATCGATATTCCCCTATATCATTACATACTATGTTTAATCCACATTAGTTTACTGTCAGCTATTTCATTACATTAAATTACTTAACCCTCATTAATCTATGATCAATATTTTCCATAGCATAATATTTTTCACTTAACCCTACTTTACATAGTATTAATCATGCCGTTGGTAAGAAATCACCAATAACCTCCTGAATGAAAAAAATTGTACGGTTTGTGGTACATTACTGT…
GcRUN018	Galeocerdo cuvier	143	143	101	101	127	127	195	199	117	117	122	122	114	120	207	215	TTATAGTACGTAAAACCAAAAGTGAAAAATTTTGGTTTTTGTACGTCAGTATGACATATTAATGATATGGCCCACATATCCTAATATACCACATACAACCCTCATTCCCTGGGTTACTTTAACAGATAATCCCCTACAGTTTCACATATACTATGTTTAATACTCATTAATCGATATTCCCCTATATCATTACATACTATGTTTAATCCACATTAGTTTACTGTCAGCTATTTCATTACATTAAATTACTTAACCCTCATTAATCTATGATCAATATTTTCCATAGCATAATATTTTTCACTTAACCCTACTTTACATAGTATTAATCATGCCGTTGGTAAGAAATCACCAATAACCTCCTGAATGAAAAAAATTGTACGGTTTGTGGTACATTACTGT…
GcRUN019	Galeocerdo cuvier	143	143	101	101	121	129	195	199	117	123	122	122	114	114	207	215	TTATAGTACGTAAAACCAAAAGTGAAAAATTTTGGTTTTTGTACGTCAGTATGACATATTAATGATATGGCCCACATATCCTAATATACCACATACAACCCTCATTCCCTGGGTTACTTTAACAGATAATCCCCTACAGTTTCACATATACTATGTTTAATACTCATTAATCGATATTCCCCTATATCATTACATACTATGTTTAATCCACATTAGTTTACTGTCAGCTATTTCATTACATTAAATTACTTAACCCTCATTAATCTATGATCAATATTTTCCATAGCATAATATTTTTCACTTAACCCTACTTTACATAGTATTAATCATGCCGTTGGTAAGAAATCACCAATAACCTCCTGAATGAAAAAAATTGTACGGTTTGTGGTACATTACTGT…
GcRUN020	Galeocerdo cuvier	143	143	101	101	121	129	195	199	117	123	122	122	114	118	207	219	TTATAGTACGTAAAACCAAAAGTGAAAAATTTTGGTTTTTGTACGTCAGTATGACATATTAATGATATGGCCCACATATCCTAATATACCACATACAACCCTCATTCCCTGGGTTACTTTAACAGATAATCCCCTACAGTTTCACATATACTATGTTTAATACTCATTAATCGATATTCCCCTATATCATTACATACTATGTTTAATCCACATTAGTTTACTGTCAGCTATTTCATTACATTAAATTACTTAACCCTCATTAATCTATGATCAATATTTTCCATAGCATAATATTTTTCACTTAACCCTACTTTACATAGTATTAATCATGCCGTTGGTAAGAAATCACCAATAACCTCCTGAATGAAAAAAATTGTACGGTTTGTGGTACATTACTGT…
GcRUN021	Galeocerdo cuvier	143	143	101	101	121	121	195	195	117	123	122	122	114	120	207	219	TTATAGTACGTAAAACCAAAAGTGAAAAATTTTGGTTTTTGTACGTCAGTATGACATATTAATGATATGGCCCACATATCCTAATATACCACATACAACCCTCATTCCCTGGGTTACTTTAACAGATAATCCCCTACAGTTTCACATATACTATGTTTAATACTCATTAATCGATATTCCCCTATATCATTACATACTATGTTTAATCCACATTAGTTTACTGTCAGCTATTTCATTACATTAAATTACTTAACCCTCATTAATCTATGATCAATATTTTCCATAGCATAATATTTTTCACTTAACCCTACTTTACATAGTATTAATCATGCCGTTGGTAAGAAATCACCAATAACCTCCTGAATGAAAAAAATTGTACGGTTTGTGGTACATTACTGT…
GcRUN022	Galeocerdo cuvier	143	143	101	101	127	129	199	199	117	117	122	122	118	122	207	215	TTATAGTACGTAAAACCAAAAGTGAAAAATTTTGGTTTTTGTACGTCAGTATGACATATTAATGATATGGCCCACATATCCTAATATACCACATACAACCCTCATTCCCTGGGTTACTTTAACAGATAATCCCCTACAGTTTCACATATACTATGTTTAATACTCATTAATCGATATTCCCCTATATCATTACATACTATGTTTAATCCACATTAGTTTACTGTCAGCTATTTCATTACATTAAATTACTTAACCCTCATTAATCTATGATCAATATTTTCCATAGCATAATATTTTTCACTTAACCCTACTTTACATAGTATTAATCATGCCGTTGGTAAGAAATCACCAATAATCTCCTGAATGAAAAAAATTGTACGGTTTGTGGTACATTACTGT…
GcRUN023	Galeocerdo cuvier	143	143	101	101	127	129	199	199	117	123	122	122	118	118	215	215	TTATAGTACGTAAAACCAAAAGTGAAAAATTTTGGTTTTTGTACGTCAGTATGACATATTAATGATATGGCCCACATATCCTAATATACCACATACAACCCTCATTCCCTGGGTTACTTTAACAGATAATCCCCTACAGTTTCACATATACTATGTTTAATACTCATTAATCGATATTCCCCTATATCATTACATACTATGTTTAATCCACATTAGTTTACTGTCAGCTATTTCATTACATTAAATTACTTAACCCTCATTAATCTATGATCAATATTTTCCATAGCATAATATTTTTCACTTAACCCTACTTTACATAGTATTAATCATGCCGTTGGTAAGAAATCACCAATAACCTCCTGAATGAAAAAAATTGTACGGTTTGTGGTACATTACTGT…
GcRUN024	Galeocerdo cuvier	143	143	101	101	127	129	199	199	117	117	122	122	114	122	207	215	TTATAGTACGTAAAACCAAAAGTGAAAAATTTTGGTTTTTGTACGTCAGTATGACATATTAATGATATGGCCCACATATCCTAATATACCACATACAACCCTCATTCCCTGGGTTACTTTAACAGATAATCCCCTACAGTTTCACATATACTATGTTTAATACTCATTAATCGATATTCCCCTATATCATTACATACTATGTTTAATCCACATTAGTTTACTGTCAGCTATTTCATTACATTAAATTACTTAACCCTCATTAATCTATGATCAATATTTTCCATAGCATAATATTTTTCACTTAACCCTACTTTACATAGTATTAATCATGCCGTTGGTAAGAAATCACCAATAACCTCCTGAATGAAAAAAATTGTACGGTTTGTGGTACATTACTGT…
GcRUN026	Galeocerdo cuvier	143	143	93	101	121	127	199	199	123	123	122	122	114	122	207	207	TTATAGTACGTAAAACCAAAAGTGAAAAATTTTGGTTTTTGTACGTCAGTATGACATATTAATGATATGGCCCACATATCCTAATATACCACATACAACCCTCATTCCCTGGGTTACTTTAACAGATAATCCCCTACAGTTTCACATATACTATGTTTAATACTCATTAATCGATATTCCCCTATATCATTACATACTATGTTTAATCCACATTAGTTTACTGTCAGCTATTTCATTACATTAAATTACTTAACCCTCATTAATCTATGATCAATATTTTCCATAGCATAATATTTTTCACTTAACCCTACTTTACATAGTATTAATCATGCCGTTGGTAAGAAATCACCAATAACCTCCTGAATGAAAAAAATTGTACGGTTTGTGGTACATTACTGT…
GcRUN027	Galeocerdo cuvier	143	143	101	101	127	129	199	199	117	123	118	122	120	122	215	215	TTATAGTACGTAAAACCAAAAGTGAAAAATTTTGGTTTTTGTACGTCAGTATGACATATTAATGATATGGCCCACATATCCTAATATACCACATACAACCCTCATTCCCTGGGTTACTTTAACAGATAATCCCCTACAGTTTCACATATACTATGTTTAATACTCATTAATCGATATTCCCCTATATCATTACATACTATGTTTAATCCACATTAGTTTACTGTCAGCTATTTCATTACATTAAATTACTTAACCCTCATTAATCTATGATCAATATTTTCCATAGCATAATATTTTTCACTTAACCCTACTTTACATAGTATTAATCATGCCGTTGGTAAGAAATCACCAATAACCTCCTGAATGAAAAAAATTGTACGGTTTGTGGTACATTACTGT…
GcRUN028	Galeocerdo cuvier	143	143	101	101	127	127	199	199	117	117	122	122	116	122	207	207	TTATAGTACGTAAAACCAAAAGTGAAAAATTTTGGTTTTTGTACGTCAGTATGACATATTAATGATATGGCCCACATATCCTAATATACCACATACAACCCTCATTCCCTGGGTTACTTTAACAGATAATCCCCTACAGTTTCACATATACTATGTTTAATACTCATTAATCGATATTCCCCTATATCATTACATACTATGTTTAATCCACATTAGTTTACTGTCAGCTATTTCATTACATTAAATTACTTAACCCTCATTAATCTATGATCAATATTTTCCATAGCATAATATTTTTCACTTAACCCTACTTTACATAGTATTAATCATGCCGTTGGTAAGAAATCACCAATAACCTCCTGAATGAAAAAAATTGTACGGTTTGTGGTACATTACTGT…
GcRUN029	Galeocerdo cuvier	143	143	101	101	127	127	199	199	117	123	122	122	118	120	215	215	TTATAGTACGTAAAACCAAAAGTGAAAAATTTTGGTTTTTGTACGTCAGTATGACATATTAATGATATGGCCCACATATCCTAATATACCACATACAACCCTCATTCCCTGGGTTACTTTAACAGATAATCCCCTACAGTTTCACATATACTATGTTTAATACTCATTAATCGATATTCCCCTATATCATTACATACTATGTTTAATCCACATTAGTTTACTGTCAGCTATTTCATTACATTAAATTACTTAACCCTCATTAATCTATGATCAATATATTCCATAGCATAATATTTTTCACTTAACCCTACTTTACATAGTATTAATCATGCCGTTGGTAAGAAATCACCAATAACCTCCTGAATGAAAAAAATTGTACGGTTTGTGGTACATTACTGT…
GcRUN030	Galeocerdo cuvier	143	143	93	101	127	129	195	199	117	123	122	122	122	122	207	207	TTATAGTACGTAAAACCAAAAGTGAAAAATTTTGGTTTTTGTACGTCAGTATGACATATTAATGATATGGCCCACATATCCTAATATACCACATACAACCCTCATTCCCTGGGTTACTTTAACAGATAATCCCCTACAGTTTCACATATACTATGTTTAATACTCATTAATCGATATTCCCCTATATCATTACATACTATGTTTAATCCACATTAGTTTACTGTCAGCTATTTCATTACATTAAATTACTTAACCCTCATTAATCTATGATCAATATTTTCCATAGCATAATATTTTTCACTTAACCCTACTTTACATAGTATTAATCATGCCGTTGGTAAGAAATCACCAATAACCTCCTGAATGAAAAAAATTGTACGGTTTGTGGTACATTACTGT…
GcRUN031	Galeocerdo cuvier	143	143	101	101	127	129	199	199	117	117	122	122	114	118	215	215	TTATAGTACGTAAAACCAAAAGTGAAAAATTTTGGTTTTTGTACGTCAGTATGACATATTAATGATATGGCCCACATATCCTAATATACCACATACAACCCTCATTCCCTGGGTTACTTTAACAGATAATCCCCTACAGTTTCACATATACTATGTTTAATACTCATTAATCGATATTCCCCTATATCATTACATACTATGTTTAATCCACATTAGTTTACTGTCAGCTATTTCATTACATTAAATTACTTAACCCTCATTAATCTATGATCAATATTTTCCATAGCATAATATTTTTCACTTAACCCTACTTTACATAGTATTAATCATGCCGTTGGTAAGAAATCACCAATAACCTCCTGAATGAAAAAAATTGTACGGTTTGTGGTACATTACTGT…
GcRUN032	Galeocerdo cuvier	143	143	101	101	121	129	195	199	117	117	122	122	122	122	215	215	TTATAGTACGTAAAACCAAAAGTGAAAAATTTTGGTTTTTGTACGTCAGTATGACATATTAATGATATGGCCCACATATCCTAATATACCACATACAACCCTCATTCCCTGGGTTACTTTAACAGATAATCCCCTACAGTTTCACATATACTATGTTTAATACTCATTAATCGATATTCCCCTATATCATTACATACTATGTTTAATCCACATTAGTTTACTGTCAGCTATTTCATTACATTAAATTACTTAACCCTCATTAATCTATGATCAATATTTTCCATAGCATAATATTTTTCACTTAACCCTACTTTACATAGTATTAATCATGCCGTTGGTAAGAAATCACCAATAACCTCCTGAATGAAAAAAATTGTACGGTTTGTGGTACATTACTGT…
GcRUN033	Galeocerdo cuvier	143	143	101	101	127	127	199	199	117	117	122	122	116	122	207	207	TTATAGTACGTAAAACCAAAAGTGAAAAATTTTGGTTTTTGTACGTCAGTATGACATATTAATGATATGGCCCACATATCCTAATATACCACATACAACCCTCATTCCCTGGGTTACTTTAACAGATAATCCCCTACAGTTTCACATATACTATGTTTAATACTCATTAATCGATATTCCCCTATATCATTACATACTATGTTTAATCCACATTAGTTTACTGTCAGCTATTTCATTACATTAAATTACTTAACCCTCATTAATCTATGATCAATATTTTCCATAGCATAATATTTTTCACTTAACCCTACTTTACATAGTATTAATCATGCCGTTGGTAAGAAATCACCAATAACCTCCTGAATGAAAAAAATTGTACGGTTTGTGGTACATTACTGT…
GcRUN034	Galeocerdo cuvier	143	143	93	101	127	127	195	199	117	123	122	122	114	118	207	215	TTATAGTACGTAAAACCAAAAGTGAAAAATTTTGGTTTTTGTACGTCAGTATGACATATTAATGATATGGCCCACATATCCTAATATACCACATACAACCCTCATTCCCTGGGTTACTTTAACAGATAATCCCCTACAGTTTCACATATACTATGTTTAATACTCATTAATCGATATTCCCCTATATCATTACATACTATGTTTAATCCACATTAGTTTACTGTCAGCTATTTCATTACATTAAATTACTTAACCCTCATTAATCTATGATCAATATTTTCCATAGCATAATATTTTTCACTTAACCCTACTTTACATAGTATTAATCATGCCGTTGGTAAGAAATCACCAATAACCTCCTGAATGAAAAAAATTGTACGGTTTGTGGTACATTACTGT…
GcRUN035	Galeocerdo cuvier	143	143	101	101	121	127	195	199	123	123	122	122	118	122	215	215	TTATAGTACGTAAAACCAAAAGTGAAAAATTTTGGTTTTTGTACGTCAGTATGACATATTAATGATATGGCCCACATATCCTAATATACCACATACAACCCTCATTCCCTGGGTTACTTTAACAGATAATCCCCTACAGTTTCACATATACTATGTTTAATACTCATTAATCGATATTCCCCTATATCATTACATACTATGTTTAATCCACATTAGTTTACTGTCAGCTATTTCATTACATTAAATTACTTAACCCTCATTAATCTATGATCAATATTTTCCATAGCATAATATTTTTCACTTAACCCTACTTTACATAGTATTAATCATGCCGTTGGTAAGAAATCACCAATAACCTCCTGAATGAAAAAAATTGTACGGTTTGTGGTACATTACTGT…
GcRUN036	Galeocerdo cuvier	143	143	101	101	127	129	195	195	123	123	122	122	114	122	215	215	TTATAGTACGTAAAACCAAAAGTGAAAAATTTTGGTTTTTGTACGTCAGTATGACATATTAATGATATGGCCCACATATCCTAATATACCACATACAACCCTCATTCCCTGGGTTACTTTAACAGATAATCCCCTACAGTTTCACATATACTATGTTTAATACTCATTAATCGATATTCCCCTATATCATTACATACTATGTTTAATCCACATTAGTTTACTGTCAGCTATTTCATTACATTAAATTACTTAACCCTCATTAATCTATGATCAATATTTTCCATAGCATAATATTTTTCACTTAACCCTACTTTACATAGTATTAATCATGCCGTTGGTAAGAAATCACCAATAACCTCCTGAATGAAAAAAATTGTACGGTTTGTGGTACATTACTGT…
GcRUN079	Galeocerdo cuvier	143	143	101	101	127	127	195	199	123	123	122	122	122	124	207	215	TTATAGTACGTAAAACCAAAAGTGAAAAATTTTGGTTTTTGTACGTCAGTATGACATATTAATGATATGGCCCACATATCCTAATATACCACATACAACCCTCATTCCCTGGGTTACTTTAACAGATAATCCCCTACAGTTTCACATATACTATGTTTAATACTCATTAATCGATATTCCCCTATATCATTACATACTATGTTTAATCCACATTAGTTTACTGTCAGCTATTTCATTACATTAAATTACTTAACCCTCATTAATCTATGATCAATATTTTCCATAGCATAATATTTTTCACTTAACCCTACTTTACATAGTATTAATCATGCCGTTGGTAAGAAATCACCAATAACCTCCTGAATGAAAAAAATTGTACGGTTTGTGGTACATTACTGT…
GcRUN080	Galeocerdo cuvier	143	143	97	101	129	129	199	199	117	117	122	122	114	118	215	215	TTATAGTACGTAAAACCAAAAGTGAAAAATTTTGGTTTTTGTACGTCAGTATGACATATTAATGATATGGCCCACATATCCTAATATACCACATACAACCCTCATTCCCTGGGTTACTTTAACAGATAATCCCCTACAGTTTCACATATACTATGTTTAATACTCATTAATCGATATTCCCCTATATCATTACATACTATGTTTAATCCACATTAGTTTACTGTCAGCTATTTCATTACATTAAATTACTTAACCCTCATTAATCTATGATCAATATTTTCCATAGCATAATATTTTTCACTTAACCCTACTTTACATAGTATTAATCATGCCGTTGGTAAGAAATCACCAATAACCTCCTGAATGAAAAAAATTGTACGGTTTGTGGTACATTACTGT…
GcRUN081	Galeocerdo cuvier	143	143	101	101	127	127	195	199	117	123	122	122	114	116	207	215	TTATAGTACGTAAAACCAAAAGTGAAAAATTTTGGTTTTTGTACGTCAGTATGACATATTAATGATATGGCCCACATATCCTAATATACCACATACAACCCTCATTCCCTGGGTTACTTTAACAGATAATCCCCTACAGTTTCACATATACTATGTTTAATACTCATTAATCGATATTCCCCTATATCATTACATACTATGTTTAATCCACATTAGTTTACTGTCAGCTATTTCATTACATTAAATTACTTAACCCTCATTAATCTATGATCAATATTTTCCATAGCATAATATTTTTCACTTAACCCTACTTTACATAGTATTAATCATGCCGTTGGTAAGAAATCACCAATAACCTCCTGAATGAAAAAAATTGTACGGTTTGTGGTACATTACTGT…
GcRUN082	Galeocerdo cuvier	143	143	101	101	121	127	199	199	117	117	122	122	116	122	207	207	TTATAGTACGTAAAACCAAAAGTGAAAAATTTTGGTTTTTGTACGTCAGTATGACATATTAATGATATGGCCCACATATCCTAATATACCACATACAACCCTCATTCCCTGGGTTACTTTAACAGATAATCCCCTACAGTTTCACATATACTATGTTTAATACTCATTAATCGATATTCCCCTATATCATTACATACTATGTTTAATCCACATTAGTTTACTGTCAGCTATTTCATTACATTAAATTACTTAACCCTCATTAATCTATGATCAATATTTTCCATAGCATAATATTTTTCACTTAACCCTACTTTACATAGTATTAATCATGCCGTTGGTAAGAAATCACCAATAACCTCCTGAATGAAAAAAATTGTACGGTTTGTGGTACATTACTGT…
GcRUN083	Galeocerdo cuvier	143	143	101	101	127	127	195	199	117	123	122	122	118	120	215	215	TTATAGTACGTAAAACCAAAAGTGAAAAATTTTGGTTTTTGTACGTCAGTATGACATATTAATGATATGGCCCACATATCCTAATATACCACATACAACCCTCATTCCCTGGGTTACTTTAACAGATAATCCCCTACAGTTTCACATATACTATGTTTAATACTCATTAATCGATATTCCCCTATATCATTACATACTATGTTTAATCCACATTAGTTTACTGTCAGCTATTTCATTACATTAAATTACTTAACCCTCATTAATCTATGATCAATATTTTCCATAGCATAATATTTTTCACTTAACCCTACTTTACATAGTATTAATCATGCCGTTGGTAAGAAATCACCAATAACCTCCTGAATGAAAAAAATTGTACGGTTTGTGGTACATTACTGT…
GcRUN084	Galeocerdo cuvier	143	143	101	101	127	129	199	199	117	123	122	122	118	122	207	215	TTATAGTACGTAAAACCAAAAGTGAAAAATTTTGGTTTTTGTACGTCAGTATGACATATTAATGATATGGCCCACATATCCTAATATACCACATACAACCCTCATTCCCTGGGTTACTTTAACAGATAATCCCCTACAGTTTCACATATACTATGTTTAATACTCATTAATCGATATTCCCCTATATCATTACATACTATGTTTAATCCACATTAGTTTACTGTCAGCTATTTCATTACATTAAATTACTTAACCCTCATTAATCTATGATCAATATTTTCCATAGCATAATATTTTTCACTTAACCCTACTTTACATAGTATTAATCATGCCGTTGGTAAGAAATCACCAATAACCTCCTGAATGAAAAAAATTGTACGGTTTGTGGTACATTACTGT…
GcRUN085	Galeocerdo cuvier	143	143	93	97	127	127	195	199	123	123	118	122	114	118	207	207	TTATAGTACGTAAAACCAAAAGTGAAAAATTTTGGTTTTTGTACGTCAGTATGACATATTAATGATATGGCCCACATATCCTAATATACCACATACAACCCTCATTCCCTGGGTTACTTTAACAGATAATCCCCTACAGTTTCACATATACTATGTTTAATACTCATTAATCGATATTCCCCTATATCATTACATACTATGTTTAATCCACATTAGTTTACTGTCAGCTATTTCATTACATTAAATTACTTAACCCTCATTAATCTATGATCAATATTTTCCATAGCATAATATTTTTCACTTAACCCTACTTTACATAGTATTAATCATGCCGTTGGTAAGAAATCACCAATAACCTCCTGAATGAAAAAAATTGTACGGTTTGTGGTACATTACTGT…
GcRUN087	Galeocerdo cuvier	143	143	101	101	121	129	195	195	117	123	122	122	122	122	207	215	TTATAGTACGTAAAACCAAAAGTGAAAAATTTTGGTTTTTGTACGTCAGTATGACATATTAATGATATGGCCCACATATCCTAATATACCACATACAACCCTCATTCCCTGGGTTACTTTAACAGATAATCCCCTACAGTTTCACATATACTATGTTTAATACTCATTAATCGATATTCCCCTATATCATTACATACTATGTTTAATCCACATTAGTTTACTGTCAGCTATTTCATTACATTAAATTACTTAACCCTCATTAATCTATGATCAATATTTTCCATAGCATAATATTTTTCACTTAACCCTACTTTACATAGTATTAATCATGCCGTTGGTAAGAAATCACCAATAACCTCCTGAATGAAAAAAATTGTACGGTTTGTGGTACATTACTGT…
GcRUN088	Galeocerdo cuvier	143	143	97	101	127	127	199	199	117	123	118	122	118	120	207	215	TTATAGTACGTAAAACCAAAAGTGAAAAATTTTGGTTTTTGTACGTCAGTATGACATATTAATGATATGGCCCACATATCCTAATATACCACATACAACCCTCATTCCCTGGGTTACTTTAACAGATAATCCCCTACAGTTTCACATATACTATGTTTAATACTCATTAATCGATATTCCCCTATATCATTACATACTATGTTTAATCCACATTAGTTTACTGTCAGCTATTTCATTACATTAAATTACTTAACCCTCATTAATCTATGATCAATATTTTCCATAGCATAATATTTTTCACTTAACCCTACTTTACATAGTATTAATCATGCCGTTGGTAAGAAATCACCAATAACCTCCTGAATGAAAAAAATTGTACGGTTTGTGGTACATTACTGT…
GcRUN089	Galeocerdo cuvier	143	143	101	101	127	127	199	199	123	123	122	122	122	122	207	215	TTATAGTACGTAAAACCAAAAGTGAAAAATTTTGGTTTTTGTACGTCAGTATGACATATTAATGATATGGCCCACATATCCTAATATACCACATACAACCCTCATTCCCTGGGTTACTTTAACAGATAATCCCCTACAGTTTCACATATACTATGTTTAATACTCATTAATCGATATTCCCCTATATCATTACATACTATGTTTAATCCACATTAGTTTACTGTCAGCTATTTCATTACATTAAATTACTTAACCCTCATTAATCTATGATCAATATTTTCCATAGCATAATATTTTTCACTTAACCCTACTTTACATAGTATTAATCATGCCGTTGGTAAGAAATCACCAATAACCTCCTGAATGAAAAAAATTGTACGGTTTGTGGTACATTACTGT…
GcRUN090	Galeocerdo cuvier	143	143	101	101	121	129	199	199	117	123	122	122	114	118	207	215	TTATAGTACGTAAAACCAAAAGTGAAAAATTTTGGTTTTTGTACGTCAGTATGACATATTAATGATATGGCCCACATATCCTAATATACCACATACAACCCTCATTCCCTGGGTTACTTTAACAGATAATCCCCTACAGTTTCACATATACTATGTTTAATACTCATTAATCGATATTCCCCTATATCATTACATACTATGTTTAATCCACATTAGTTTACTGTCAGCTATTTCATTACATTAAATTACTTAACCCTCATTAATCTATGATCAATATTTTCCATAGCATAATATTTTTCACTTAACCCTACTTTACATAGTATTAATCATGCCGTTGGTAAGAAATCACCAATAACCTCCTGAATGAAAAAAATTGTACGGTTTGTGGTACATTACTGT…
GcRUN091	Galeocerdo cuvier	143	143	101	101	121	127	199	199	123	123	122	122	122	122	215	215	TTATAGTACGTAAAACCAAAAGTGAAAAATTTTGGTTTTTGTACGTCAGTATGACATATTAATGATATGGCCCACATATCCTAATATACCACATACAACCCTCATTCCCTGGGTTACTTTAACAGATAATCCCCTACAGTTTCACATATACTATGTTTAATACTCATTAATCGATATTCCCCTATATCATTACATACTATGTTTAATCCACATTAGTTTACTGTCAGCTATTTCATTACATTAAATTACTTAACCCTCATTAATCTATGATCAATATTTTCCATAGCATAATATTTTTCACTTAACCCTACTTTACATAGTATTAATCATGCCGTTGGTAAGAAATCACCAATAACCTCCTGAATGAAAAAAATTGTACGGTTTGTGGTACATTACTGT…
GcRUN092	Galeocerdo cuvier	143	143	101	101	127	127	199	199	123	123	122	122	122	130	207	207	TTATAGTACGTAAAACCAAAAGTGAAAAATTTTGGTTTTTGTACGTCAGTATGACATATTAATGATATGGCCCACATATCCTAATATACCACATACAACCCTCATTCCCTGGGTTACTTTAACAGATAATCCCCTACAGTTTCACATATACTATGTTTAATACTCATTAATCGATATTCCCCTATATCATTACATACTATGTTTAATCCACATTAGTTTACTGTCAGCTATTTCATTACATTAAATTACTTAACCCTCATTAATCTATGATCAATATTTTCCATAGCATAATATTTTTCACTTAACCCTACTTTACATAGTATTAATCATGCCGTTGGTAAGAAATCACCAATAACCTCCTGAATGAAAAAAATTGTACGGTTTGTGGTACATTACTGT…
GcRUN093	Galeocerdo cuvier	143	143	101	101	121	129	195	199	117	123	122	122	118	122	207	207	TTATAGTACGTAAAACCAAAAGTGAAAAATTTTGGTTTTTGTACGTCAGTATGACATATTAATGATATGGCCCACATATCCTAATATACCACATACAACCCTCATTCCCTGGGTTACTTTAACAGATAATCCCCTACAGTTTCACATATACTATGTTTAATACTCATTAATCGATATTCCCCTATATCATTACATACTATGTTTAATCCACATTAGTTTACTGTCAGCTATTTCATTACATTAAATTACTTAACCCTCATTAATCTATGATCAATATTTTCCATAGCATAATATTTTTCACTTAACCCTACTTTACATAGTATTAATCATGCCGTTGGTAAGAAATCACCAATAACCTCCTGAATGAAAAAAATTGTACGGTTTGTGGTACATTACTGT…
GcRUN094	Galeocerdo cuvier	143	143	101	101	127	129	195	199	117	117	122	122	114	114	207	215	TTATAGTACGTAAAACCAAAAGTGAAAAATTTTGGTTTTTGTACGTCAGTATGACATATTAATGATATGGCCCACATATCCTAATATACCACATACAACCCTCATTCCCTGGGTTACTTTAACAGATAATCCCCTACAGTTTCACATATACTATGTTTAATACTCATTAATCGATATTCCCCTATATCATTACATACTATGTTTAATCCACATTAGTTTACTGTCAGCTATTTCATTACATTAAATTACTTAACCCTCATTAATCTATGATCAATATTTTCCATAGCATAATATTTTTCACTTAACCCTACTTTACATAGTATTAATCATGCCGTTGGTAAGAAATCACCAATAACCTCCTGAATGAAAAAAATTGTACGGTTTGTGGTACATTACTGT…
GcRUN095	Galeocerdo cuvier	143	143	101	101	127	127	199	199	117	123	122	122	114	122	207	207	TTATAGTACGTAAAACCAAAAGTGAAAAATTTTGGTTTTTGTACGTCAGTATGACATATTAATGATATGGCCCACATATCCTAATATACCACATACAACCCTCATTCCCTGGGTTACTTTAACAGATAATCCCCTACAGTTTCACATATACTATGTTTAATACTCATTAATCGATATTCCCCTATATCATTACATACTATGTTTAATCCACATTAGTTTACTGTCAGCTATTTCATTACATTAAATTACTTAACCCTCATTAATCTATGATCAATATTTTCCATAGCATAATATTTTTCACTTAACCCTACTTTACATAGTATTAATCATGCCGTTGGTAAGAAATCACCAATAACCTCCTGAATGAAAAAAATTGTACGGTTTGTGGTACATTACTGT…
GcRUN096	Galeocerdo cuvier	143	143	101	101	121	121	199	199	117	117	122	122	114	122	207	207	TTATAGTACGTAAAACCAAAAGTGAAAAATTTTGGTTTTTGTACGTCAGTATGACATATTAATGATATGGCCCACATATCCTAATATACCACATACAACCCTCATTCCCTGGGTTACTTTAACAGATAATCCCCTACAGTTTCACATATACTATGTTTAATACTCATTAATCGATATTCCCCTATATCATTACATACTATGTTTAATCCACATTAGTTTACTGTCAGCTATTTCATTACATTAAATTACTTAACCCTCATTAATCTATGATCAATATTTTCCATAGCATAATATTTTTCACTTAACCCTACTTTACATAGTATTAATCATGCCGTTGGTAAGAAATCACCAATAACCTCCTGAATGAAAAAAATTGTACGGTTTGTGGTACATTACTGT…
GcRUN097	Galeocerdo cuvier	143	143	101	101	127	127	195	199	117	123	122	122	114	122	207	215	TTATAGTACGTAAAACCAAAAGTGAAAAATTTTGGTTTTTGTACGTCAGTATGACATATTAATGATATGGCCCACATATCCTAATATACCACATACAACCCTCATTCCCTGGGTTACTTTAACAGATAATCCCCTACAGTTTCACATATACTATGTTTAATACTCATTAATCGATATTCCCCTATATCATTACATACTATGTTTAATCCACATTAGTTTACTGTCAGCTATTTCATTACATTAAATTACTTAACCCTCATTAATCTATGATCAATATTTTCCATAGCATAATATTTTTCACTTAACCCTACTTTACATAGTATTAATCATGCCGTTGGTAAGAAATCACCAATAACCTCCTGAATGAAAAAAATTGTACGGTTTGTGGTACATTACTGT…
GcRUN098	Galeocerdo cuvier	143	143	101	101	121	129	199	199	117	117	118	122	118	122	207	215	TTATAGTACGTAAAACCAAAAGTGAAAAATTTTGGTTTTTGTACGTCAGTATGACATATTAATGATATGGCCCACATATCCTAATATACCACATACAACCCTCATTCCCTGGGTTACTTTAACAGATAATCCCCTACAGTTTCACATATACTATGTTTAATACTCATTAATCGATATTCCCCTATATCATTACATACTATGTTTAATCCACATTAGTTTACTGTCAGCTATTTCATTACATTAAATTACTTAACCCTCATTAATCTATGATCAATATTTTCCATAGCATAATATTTTTCACTTAACCCTACTTTACATAGTATTAATCATGCCGTTGGTAAGAAATCACCAATAACCTCCTGAATGAAAAAAATTGTACGGTTTGTGGTACATTACTGT…
GcRUN099	Galeocerdo cuvier	143	143	101	101	121	121	199	199	117	117	122	122	114	116	207	207	TTATAGTACGTAAAACCAAAAGTGAAAAATTTTGGTTTTTGTACGTCAGTATGACATATTAATGATATGGCCCACATATCCTAATATACCACATACAACCCTCATTCCCTGGGTTACTTTAACAGATAATCCCCTACAGTTTCACATATACTATGTTTAATACTCATTAATCGATATTCCCCTATATCATTACATACTATGTTTAATCCACATTAGTTTACTGTCAGCTATTTCATTACATTAAATTACTTAACCCTCATTAATCTATGATCAATATTTTCCATAGCATAATATTTTTCACTTAACCCTACTTTACATAGTATTAATCATGCCGTTGGTAAGAAATCACCAATAACCTCCTGAATGAAAAAAATTGTACGGTTTGTGGTACATTACTGT…
GcRUN100	Galeocerdo cuvier	143	143	93	101	127	127	195	199	117	123	122	122	118	122	207	215	TTATAGTACGTAAAACCAAAAGTGAAAAATTTTGGTTTTTGTACGTCAGTATGACATATTAATGATATGGCCCACATATCCTAATATACCACATACAACCCTCATTCCCTGGGTTACTTTAACAGATAATCCCCTACAGTTTCACATATACTATGTTTAATACTCATTAATCGATATTCCCCTATATCATTACATACTATGTTTAATCCACATTAGTTTACTGTCAGCTATTTCATTACATTAAATTACTTAACCCTCATTAATCTATGATCAATATTTTCCATAGCATAATATTTTTCACTTAACCCTACTTTACATAGTATTAATCATGCCGTTGGTAAGAAATCACCAATAACCTCCTGAATGAAAAAAATTGTACGGTTTGTGGTACATTACTGT…
GcRUN101	Galeocerdo cuvier	143	143	101	105	127	129	195	199	117	117	116	122	114	118	207	207	TTATAGTACGTAAAACCAAAAGTGAAAAATTTTGGTTTTTGTACGTCAGTATGACATATTAATGATATGGCCCACATATCCTAATATACCACATACAACCCTCATTCCCTGGGTTACTTTAACAGATAATCCCCTACAGTTTCACATATACTATGTTTAATACTCATTAATCGATATTCCCCTATATCATTACATACTATGTTTAATCCACATTAGTTTACTGTCAGCTATTTCATTACATTAAATTACTTAACCCTCATTAATCTATGATCAATATTTTCCATAGCATAATATTTTTCACTTAACCCTACTTTACATAGTATTAATCATGCCGTTGGTAAGAAATCACCAATAACCTCCTGAATGAAAAAAATTGTACGGTTTGTGGTACATTACTGT…
GcRUN102	Galeocerdo cuvier	143	143	101	101	127	127	199	199	117	123	118	122	116	122	207	215	TTATAGTACGTAAAACCAAAAGTGAAAAATTTTGGTTTTTGTACGTCAGTATGACATATTAATGATATGGCCCACATATCCTAATATACCACATACAACCCTCATTCCCTGGGTTACTTTAACAGATAATCCCCTACAGTTTCACATATACTATGTTTAATACTCATTAATCGATATTCCCCTATATCATTACATACTATGTTTAATCCACATTAGTTTACTGTCAGCTATTTCATTACATTAAATTACTTAACCCTCATTAATCTATGATCAATATTTTCCATAGCATAATATTTTTCACTTAACCCTACTTTACATAGTATTAATCATGCCGTTGGTAAGAAATCACCAATAATCTCCTGAATGAAAAAAATTGTACGGTTTGTGGTACATTACTGT…
GcRUN103	Galeocerdo cuvier	143	143	101	101	127	127	199	199	123	123	122	122	120	122	207	215	TTATAGTACGTAAAACCAAAAGTGAAAAATTTTGGTTTTTGTACGTCAGTATGACATATTAATGATATGGCCCACATATCCTAATATACCACATACAACCCTCATTCCCTGGGTTACTTTAACAGATAATCCCCTACAGTTTCACATATACTATGTTTAATACTCATTAATCGATATTCCCCTATATCATTACATACTATGTTTAATCCACATTAGTTTACTGTCAGCTATTTCATTACATTAAATTACTTAACCCTCATTAATCTATGATCAATATTTTCCATAGCATAATATTTTTCACTTAACCCTACTTTACATAGTATTAATCATGCCGTTGGTAAGAAATCACCAATAACCTCCTGAATGAAAAAAATTGTACGGTTTGTGGTACATTACTGT…
GcRUN104	Galeocerdo cuvier	143	143	101	101	127	127	195	199	117	117	122	122	114	114	207	215	TTATAGTACGTAAAACCAAAAGTGAAAAATTTTGGTTTTTGTACGTCAGTATGACATATTAATGATATGGCCCACATATCCTAATATACCACATACAACCCTCATTCCCTGGGTTACTTTAACAGATAATCCCCTACAGTTTCACATATACTATGTTTAATACTCATTAATCGATATTCCCCTATATCATTACATACTATGTTTAATCCACATTAGTTTACTGTCAGCTATTTCATTACATTAAATTACTTAACCCTCATTAATCTATGATCAATATTTTCCATAGCATAATATTTTTCACTTAACCCTACTTTACATAGTATTAATCATGCCGTTGGTAAGAAATCACCAATAACCTCCTGAATGAAAAAAATTGTACGGTTTGTGGTACATTACTGT…
GcRUN105	Galeocerdo cuvier	143	143	101	101	127	129	195	199	117	123	122	122	118	122	207	215	TTATAGTACGTAAAACCAAAAGTGAAAAATTTTGGTTTTTGTACGTCAGTATGACATATTAATGATATGGCCCACATATCCTAATATACCACATACAACCCTCATTCCCTGGGTTACTTTAACAGATAATCCCCTACAGTTTCACATATACTATGTTTAATACTCATTAATCGATATTCCCCTATATCATTACATACTATGTTTAATCCACATTAGTTTACTGTCAGCTATTTCATTACATTAAATTACTTAACCCTCATTAATCTATGATCAATATTTTCCATAGCATAATATTTTTCACTTAACCCTACTTTACATAGTATTAATCATGCCGTTGGTAAGAAATCACCAATAACCTCCTGAATGAAAAAAATTGTACGGTTTGTGGTACATTACTGT…
GcRUN106	Galeocerdo cuvier	143	143	101	101	127	127	195	195	117	117	118	122	118	120	207	215	TTATAGTACGTAAAACCAAAAGTGAAAAATTTTGGTTTTTGTACGTCAGTATGACATATTAATGATATGGCCCACATATCCTAATATACCACATACAACCCTCATTCCCTGGGTTACTTTAACAGATAATCCCCTACAGTTTCACATATACTATGTTTAATACTCATTAATCGATATTCCCCTATATCATTACATACTATGTTTAATCCACATTAGTTTACTGTCAGCTATTTCATTACATTAAATTACTTAACCCTCATTAATCTATGATCAATATTTTCCATAGCATAATATTTTTCACTTAACCCTACTTTACATAGTATTAATCATGCCGTTGGTAAGAAATCACCAATAACCTCCTGAATGAAAAAAATTGTACGGTTTGTGGTACATTACTGT…
GcRUN107	Galeocerdo cuvier	143	143	101	101	127	127	195	199	117	123	122	122	114	114	215	215	TTATAGTACGTAAAACCAAAAGTGAAAAATTTTGGTTTTTGTACGTCAGTATGACATATTAATGATATGGCCCACATATCCTAATATACCACATACAACCCTCATTCCCTGGGTTACTTTAACAGATAATCCCCTACAGTTTCACATATACTATGTTTAATACTCATTAATCGATATTCCCCTATATCATTACATACTATGTTTAATCCACATTAGTTTACTGTCAGCTATTTCATTACATTAAATTACTTAACCCTCATTAATCTATGATCAATATTTTCCATAGCATAATATTTTTCACTTAACCCTACTTTACATAGTATTAATCATGCCGTTGGTAAGAAATCACCAATAACCTCCTGAATGAAAAAAATTGTACGGTTTGTGGTACATTACTGT…
GcRUN108	Galeocerdo cuvier	143	143	101	101	127	127	199	199	117	123	122	122	118	122	207	215	TTATAGTACGTAAAACCAAAAGTGAAAAATTTTGGTTTTTGTACGTCAGTATGACATATTAATGATATGGCCCACATATCCTAATATACCACATACAACCCTCATTCCCTGGGTTACTTTAACAGATAATCCCCTACAGTTTCACATATACTATGTTTAATACTCATTAATCGATATTCCCCTATATCATTACATACTATGTTTAATCCACATTAGTTTACTGTCAGCTATTTCATTACATTAAATTACTTAACCCTCATTAATCTATGATCAATATTTTCCATAGCATAATATTTTTCACTTAACCCTACTTTACATAGTATTAATCATGCCGTTGGTAAGAAATCACCAATAACCTCCTGAATGAAAAAAATTGTACGGTTTGTGGTACATTACTGT…
GcRUN109	Galeocerdo cuvier	143	143	101	101	127	129	199	199	123	123	122	122	116	120	207	215	TTATAGTACGTAAAACCAAAAGTGAAAAATTTTGGTTTTTGTACGTCAGTATGACATATTAATGATATGGCCCACATATCCTAATATACCACATACAACCCTCATTCCCTGGGTTACTTTAACAGATAATCCCCTACAGTTTCACATATACTATGTTTAATACTCATTAATCGATATTCCCCTATATCATTACATACTATGTTTAATCCACATTAGTTTACTGTCAGCTATTTCATTACATTAAATTACTTAACCCTCATTAATCTATGATCAATATTTTCCATAGCATAATATTTTTCACTTAACCCTACTTTACATAGTATTAATCATGCCGTTGGTAAGAAATCACCAATAACCTCCTGAATGAAAAAAATTGTACGGTTTGTGGTACATTACTGT…
GcRUN110	Galeocerdo cuvier	143	143	101	101	127	127	199	199	123	123	122	122	114	122	215	215	TTATAGTACGTAAAACCAAAAGTGAAAAATTTTGGTTTTTGTACGTCAGTATGACATATTAATGATATGGCCCACATATCCTAATATACCACATACAACCCTCATTCCCTGGGTTACTTTAACAGATAATCCCCTACAGTTTCACATATACTATGTTTAATACTCATTAATCGATATTCCCCTATATCATTACATACTATGTTTAATCCACATTAGTTTACTGTCAGCTATTTCATTACATTAAATTACTTAACCCTCATTAATCTATGATCAATATTTTCCATAGCATAATATTTTTCACTTAACCCTACTTTACATAGTATTAATCATGCCGTTGGTAAGAAATCACCAATAACCTCCTGAATGAAAAAAATTGTACGGTTTGTGGTACATTACTGT…
GcRUN111	Galeocerdo cuvier	143	143	101	101	127	127	199	199	117	117	122	122	116	122	207	215	TTATAGTACGTAAAACCAAAAGTGAAAAATTTTGGTTTTTGTACGTCAGTATGACATATTAATGATATGGCCCACATATCCTAATATACCACATACAACCCTCATTCCCTGGGTTACTTTAACAGATAATCCCCTACAGTTTCACATATACTATGTTTAATACTCATTAATCGATATTCCCCTATATCATTACATACTATGTTTAATCCACATTAGTTTACTGTCAGCTATTTCATTACATTAAATTACTTAACCCTCATTAATCTATGATCAATATTTTCCATAGCATAATATTTTTCACTTAACCCTACTTTACATAGTATTAATCATGCCGTTGGTAAGAAATCACCAATAACCTCCTGAATGAAAAAAATTGTACGGTTTGTGGTACATTACTGT…
GcRUN112	Galeocerdo cuvier	143	143	101	101	127	127	195	199	117	117	122	122	118	128	207	207	TTATAGTACGTAAAACCAAAAGTGAAAAATTTTGGTTTTTGTACGTCAGTATGACATATTAATGATATGGCCCACATATCCTAATATACCACATACAACCCTCATTCCCTGGGTTACTTTAACAGATAATCCCCTACAGTTTCACATATACTATGTTTAATACTCATTAATCGATATTCCCCTATATCATTACATACTATGTTTAATCCACATTAGTTTACTGTCAGCTATTTCATTACATTAAATTACTTAACCCTCATTAATCTATGATCAATATTTTCCATAGCATAATATTTTTCACTTAACCCTACTTTACATAGTATTAATCATGCCGTTGGTAAGAAATCACCAATAACCTCCTGAATGAAAAAAATTGTACGGTTTGTGGTACATTACTGT…
GcRUN113	Galeocerdo cuvier	143	143	101	101	127	129	199	199	117	123	122	122	114	122	207	207	TTATAGTACGTAAAACCAAAAGTGAAAAATTTTGGTTTTTGTACGTCAGTATGACATATTAATGATATGGCCCACATATCCTAATATACCACATACAACCCTCATTCCCTGGGTTACTTTAACAGATAATCCCCTACAGTTTCACATATACTATGTTTAATACTCATTAATCGATATTCCCCTATATCATTACATACTATGTTTAATCCACATTAGTTTACTGTCAGCTATTTCATTACATTAAATTACTTAACCCTCATTAATCTATGATCAATATTTTCCATAGCATAATATTTTTCACTTAACCCTACTTTACATAGTATTAATCATGCCGTTGGTAAGAAATCACCAATAACCTCCTGAATGAAAAAAATTGTACGGTTTGTGGTACATTACTGT…
GcRUN114	Galeocerdo cuvier	143	143	101	105	127	129	199	199	117	123	122	122	114	116	207	215	TTATAGTACGTAAAACCAAAAGTGAAAAATTTTGGTTTTTGTACGTCAGTATGACATATTAATGATATGGCCCACATATCCTAATATACCACATACAACCCTCATTCCCTGGGTTACTTTAACAGATAATCCCCTACAGTTTCACATATACTATGTTTAATACTCATTAATCGATATTCCCCTATATCATTACATACTATGTTTAATCCACATTAGTTTACTGTCAGCTATTTCATTACATTAAATTACTTAACCCTCATTAATCTATGATCAATATTTTCCATAGCATAATATTTTTCACTTAACCCTACTTTACATAGTATTAATCATGCCGTTGGTAAGAAATCACCAATAACCTCCTGAATGAAAAAAATTGTACGGTTTGTGGTACATTACTGT…
GcRUN115	Galeocerdo cuvier	143	143	101	101	121	121	195	199	117	123	122	122	120	120	215	215	TTATAGTACGTAAAACCAAAAGTGAAAAATTTTGGTTTTTGTACGTCAGTATGACATATTAATGATATGGCCCACATATCCTAATATACCACATACAACCCTCATTCCCTGGGTTACTTTAACAGATAATCCCCTACAGTTTCACATATACTATGTTTAATACTCATTAATCGATATTCCCCTATATCATTACATACTATGTTTAATCCACATTAGTTTACTGTCAGCTATTTCATTACATTAAATTACTTAACCCTCATTAATCTATGATCAATATTTTCCATAGCATAATATTTTTCACTTAACCCTACTTTACATAGTATTAATCATGCCGTTGGTAAGAAATCACCAATAACCTCCTGAATGAAAAAAATTGTACGGTTTGTGGTACATTACTGT…
GcRUN116	Galeocerdo cuvier	143	143	101	101	127	127	195	199	117	117	122	122	114	118	207	207	TTATAGTACGTAAAACCAAAAGTGAAAAATTTTGGTTTTTGTACGTCAGTATGACATATTAATGATATGGCCCACATATCCTAATATACCACATACAACCCTCATTCCCTGGGTTACTTTAACAGATAATCCCCTACAGTTTCACATATACTATGTTTAATACTCATTAATCGATATTCCCCTATATCATTACATACTATGTTTAATCCACATTAGTTTACTGTCAGCTATTTCATTACATTAAATTACTTAACCCTCATTAATCTATGATCAATATTTTCCATAGCATAATATTTTTCACTTAACCCTACTTTACATAGTATTAATCATGCCGTTGGTAAGAAATCACCAATAACCTCCTGAATGAAAAAAATTGTACGGTTTGTGGTACATTACTGT…
GcRUN117	Galeocerdo cuvier	143	143	101	101	127	127	199	199	123	123	122	122	114	122	207	215	TTATAGTACGTAAAACCAAAAGTGAAAAATTTTGGTTTTTGTACGTCAGTATGACATATTAATGATATGGCCCACATATCCTAATATACCACATACAACCCTCATTCCCTGGGTTACTTTAACAGATAATCCCCTACAGTTTCACATATACTATGTTTAATACTCATTAATCGATATTCCCCTATATCATTACATACTATGTTTAATCCACATTAGTTTACTGTCAGCTATTTCATTACATTAAATTACTTAACCCTCATTAATCTATGATCAATATTTTCCATAGCATAATATTTTTCACTTAACCCTACTTTACATAGTATTAATCATGCCGTTGGTAAGAAATCACCAATAACCTCCTGAATGAAAAAAATTGTACGGTTTGTGGTACATTACTGT…
GcRUN118	Galeocerdo cuvier	143	143	101	101	121	121	199	199	123	123	122	122	114	114	207	219	TTATAGTACGTAAAACCAAAAGTGAAAAATTTTGGTTTTTGTACGTCAGTATGACATATTAATGATATGGCCCACATATCCTAATATACCACATACAACCCTCATTCCCTGGGTTACTTTAACAGATAATCCCCTACAGTTTCACATATACTATGTTTAATACTCATTAATCGATATTCCCCTATATCATTACATACTATGTTTAATCCACATTAGTTTACTGTCAGCTATTTCATTACATTAAATTACTTAACCCTCATTAATCTATGATCAATATTTTCCATAGCATAATATTTTTCACTTAACCCTACTTTACATAGTATTAATCATGCCGTTGGTAAGAAATCACCAATAACCTCCTGAATGAAAAAAATTGTACGGTTTGTGGTACATTACTGT…
GcRUN119	Galeocerdo cuvier	143	143	101	101	121	127	195	195	117	123	122	122	118	122	207	207	TTATAGTACGTAAAACCAAAAGTGAAAAATTTTGGTTTTTGTACGTCAGTATGACATATTAATGATATGGCCCACATATCCTAATATACCACATACAACCCTCATTCCCTGGGTTACTTTAACAGATAATCCCCTACAGTTTCACATATACTATGTTTAATACTCATTAATCGATATTCCCCTATATCATTACATACTATGTTTAATCCACATTAGTTTACTGTCAGCTATTTCATTACATTAAATTACTTAACCCTCATTAATCTATGATCAATATTTTCCATAGCATAATATTTTTCACTTAACCCTACTTTACATAGTATTAATCATGCCGTTGGTAAGAAATCACCAATAACCTCCTGAATGAAAAAAATTGTACGGTTTGTGGTACATTACTGT…
GcRUN120	Galeocerdo cuvier	143	143	97	101	127	129	199	199	123	123	122	122	116	120	207	207	TTATAGTACGTAAAACCAAAAGTGAAAAATTTTGGTTTTTGTACGTCAGTATGACATATTAATGATATGGCCCACATATCCTAATATACCACATACAACCCTCATTCCCTGGGTTACTTTAACAGATAATCCCCTACAGTTTCACATATACTATGTTTAATACTCATTAATCGATATTCCCCTATATCATTACATACTATGTTTAATCCACATTAGTTTACTGTCAGCTATTTCATTACATTAAATTACTTAACCCTCATTAATCTATGATCAATATTTTCCATAGCATAATATTTTTCACTTAACCCTACTTTACATAGTATTAATCATGCCGTTGGTAAGAAATCACCAATAACCTCCTGAATGAAAAAAATTGTACGGTTTGTGGTACATTACTGT…
GcRUN121	Galeocerdo cuvier	143	143	101	101	121	127	195	199	123	123	122	122	118	118	207	215	TTATAGTACGTAAAACCAAAAGTGAAAAATTTTGGTTTTTGTACGTCAGTATGACATATTAATGATATGGCCCACATATCCTAATATACCACATACAACCCTCATTCCCTGGGTTACTTTAACAGATAATCCCCTACAGTTTCACATATACTATGTTTAATACTCATTAATCGATATTCCCCTATATCATTACATACTATGTTTAATCCACATTAGTTTACTGTCAGCTATTTCATTACATTAAATTACTTAACCCTCATTAATCTATGATCAATATTTTCCATAGCATAATATTTTTCACTTAACCCTACTTTACATAGTATTAATCATGCCGTTGGTAAGAAATCACCAATAACCTCCTGAATGAAAAAAATTGTACGGTTTGTGGTACATTACTGT…
GcRUN122	Galeocerdo cuvier	143	143	97	101	127	127	195	199	117	123	122	122	122	122	207	215	TTATAGTACGTAAAACCAAAAGTGAAAAATTTTGGTTTTTGTACGTCAGTATGACATATTAATGATATGGCCCACATATCCTAATATACCACATACAACCCTCATTCCCTGGGTTACTTTAACAGATAATCCCCTACAGTTTCACATATACTATGTTTAATACTCATTAATCGATATTCCCCTATATCATTACATACTATGTTTAATCCACATTAGTTTACTGTCAGCTATTTCATTACATTAAATTACTTAACCCTCATTAATCTATGATCAATATTTTCCATAGCATAATATTTTTCACTTAACCCTACTTTACATAGTATTAATCATGCCGTTGGTAAGAAATCACCAATAACCTCCTGAATGAAAAAAATTGTACGGTTTGTGGTACATTACTGT…
GcRUN123	Galeocerdo cuvier	143	143	101	101	127	127	199	199	117	117	118	122	114	118	207	215	TTATAGTACGTAAAACCAAAAGTGAAAAATTTTGGTTTTTGTACGTCAGTATGACATATTAATGATATGGCCCACATATCCTAATATACCACATACAACCCTCATTCCCTGGGTTACTTTAACAGATAATCCCCTACAGTTTCACATATACTATGTTTAATACTCATTAATCGATATTCCCCTATATCATTACATACTATGTTTAATCCACATTAGTTTACTGTCAGCTATTTCATTACATTAAATTACTTAACCCTCATTAATCTATGATCAATATTTTCCATAGCATAATATTTTTCACTTAACCCTACTTTACATAGTATTAATCATGCCGTTGGTAAGAAATCACCAATAACCTCCTGAATGAAAAAAATTGTACGGTTTGTGGTACATTACTGT…
GcRUN124	Galeocerdo cuvier	143	143	101	101	127	129	199	199	117	123	122	122	114	118	207	207	TTATAGTACGTAAAACCAAAAGTGAAAAATTTTGGTTTTTGTACGTCAGTATGACATATTAATGATATGGCCCACATATCCTAATATACCACATACAACCCTCATTCCCTGGGTTACTTTAACAGATAATCCCCTACAGTTTCACATATACTATGTTTAATACTCATTAATCGATATTCCCCTATATCATTACATACTATGTTTAATCCACATTAGTTTACTGTCAGCTATTTCATTACATTAAATTACTTAACCCTCATTAATCTATGATCAATATTTTCCATAGCATAATATTTTTCACTTAACCCTACTTTACATAGTATTAATCATGCCGTTGGTAAGAAATCACCAATAACCTCCTGAATGAAAAAAATTGTACGGTTTGTGGTACATTACTGT…
GcRUN125	Galeocerdo cuvier	143	143	101	101	127	129	199	199	117	123	122	122	114	118	207	215	TTATAGTACGTAAAACCAAAAGTGAAAAATTTTGGTTTTTGTACGTCAGTATGACATATTAATGATATGGCCCACATATCCTAATATACCACATACAACCCTCATTCCCTGGGTTACTTTAACAGATAATCCCCTACAGTTTCACATATACTATGTTTAATACTCATTAATCGATATTCCCCTATATCATTACATACTATGTTTAATCCACATTAGTTTACTGTCAGCTATTTCATTACATTAAATTACTTAACCCTCATTAATCTATGATCAATATTTTCCATAGCATAATATTTTTCACTTAACCCTACTTTACATAGTATTAATCATGCCGTTGGTAAGAAATCACCAATAACCTCCTGAATGAAAAAAATTGTACGGTTTGTGGTACATTACTGT…
GcRUN126	Galeocerdo cuvier	143	143	101	101	121	129	195	199	117	117	122	122	118	122	207	207	TTATAGTACGTAAAACCAAAAGTGAAAAATTTTGGTTTTTGTACGTCAGTATGACATATTAATGATATGGCCCACATATCCTAATATACCACATACAACCCTCATTCCCTGGGTTACTTTAACAGATAATCCCCTACAGTTTCACATATACTATGTTTAATACTCATTAATCGATATTCCCCTATATCATTACATACTATGTTTAATCCACATTAGTTTACTGTCAGCTATTTCATTACATTAAATTACTTAACCCTCATTAATCTATGATCAATATTTTCCATAGCATAATATTTTTCACTTAACCCTACTTTACATAGTATTAATCATGCCGTTGGTAAGAAATCACCAATAACCTCCTGAATGAAAAAAATTGTACGGTTTGTGGTACATTACTGT…
GcRUN127	Galeocerdo cuvier	143	143	101	101	121	127	195	199	117	123	122	122	120	120	207	207	TTATAGTACGTAAAACCAAAAGTGAAAAATTTTGGTTTTTGTACGTCAGTATGACATATTAATGATATGGCCCACATATCCTAATATACCACATACAACCCTCATTCCCTGGGTTACTTTAACAGATAATCCCCTACAGTTTCACATATACTATGTTTAATACTCATTAATCGATATTCCCCTATATCATTACATACTATGTTTAATCCACATTAGTTTACTGTCAGCTATTTCATTACATTAAATTACTTAACCCTCATTAATCTATGATCAATATTTTCCATAGCATAATATTTTTCACTTAACCCTACTTTACATAGTATTAATCATGCCGTTGGTAAGAAATCACCAATAACCTCCTGAATGAAAAAAATTGTACGGTTTGTGGTACATTACTGT…
GcRUN128	Galeocerdo cuvier	143	143	101	101	127	127	199	199	117	117	122	122	118	120	207	207	TTATAGTACGTAAAACCAAAAGTGAAAAATTTTGGTTTTTGTACGTCAGTATGACATATTAATGATATGGCCCACATATCCTAATATACCACATACAACCCTCATTCCCTGGGTTACTTTAACAGATAATCCCCTACAGTTTCACATATACTATGTTTAATACTCATTAATCGATATTCCCCTATATCATTACATACTATGTTTAATCCACATTAGTTTACTGTCAGCTATTTCATTACATTAAATTACTTAACCCTCATTAATCTATGATCAATATTTTCCATAGCATAATATTTTTCACTTAACCCTACTTTACATAGTATTAATCATGCCGTTGGTAAGAAATCACCAATAACCTCCTGAATGAAAAAAATTGTACGGTTTGTGGTACATTACTGT…
GcRUN129	Galeocerdo cuvier	143	143	101	101	121	127	199	199	117	123	122	122	122	122	207	207	TTATAGTACGTAAAACCAAAAGTGAAAAATTTTGGTTTTTGTACGTCAGTATGACATATTAATGATATGGCCCACATATCCTAATATACCACATACAACCCTCATTCCCTGGGTTACTTTAACAGATAATCCCCTACAGTTTCACATATACTATGTTTAATACTCATTAATCGATATTCCCCTATATCATTACATACTATGTTTAATCCACATTAGTTTACTGTCAGCTATTTCATTACATTAAATTACTTAACCCTCATTAATCTATGATCAATATTTTCCATAGCATAATATTTTTCACTTAACCCTACTTTACATAGTATTAATCATGCCGTTGGTAAGAAATCACCAATAACCTCCTGAATGAAAAAAATTGTACGGTTTGTGGTACATTACTGT…
GcRUN130	Galeocerdo cuvier	143	143	101	101	127	129	195	199	123	123	122	122	118	118	207	207	TTATAGTACGTAAAACCAAAAGTGAAAAATTTTGGTTTTTGTACGTCAGTATGACATATTAATGATATGGCCCACATATCCTAATATACCACATACAACCCTCATTCCCTGGGTTACTTTAACAGATAATCCCCTACAGTTTCACATATACTATGTTTAATACTCATTAATCGATATTCCCCTATATCATTACATACTATGTTTAATCCACATTAGTTTACTGTCAGCTATTTCATTACATTAAATTACTTAACCCTCATTAATCTATGATCAATATTTTCCATAGCATAATATTTTTCACTTAACCCTACTTTACATAGTATTAATCATGCCGTTGGTAAGAAATCACCAATAACCTCCTGAATGAAAAAAATTGTACGGTTTGTGGTACATTACTGT…
GcRUN131	Galeocerdo cuvier	143	143	101	101	127	129	195	199	123	123	122	122	114	122	207	215	TTATAGTACGTAAAACCAAAAGTGAAAAATTTTGGTTTTTGTACGTCAGTATGACATATTAATGATATGGCCCACATATCCTAATATACCACATACAACCCTCATTCCCTGGGTTACTTTAACAGATAATCCCCTACAGTTTCACATATACTATGTTTAATACTCATTAATCGATATTCCCCTATATCATTACATACTATGTTTAATCCACATTAGTTTACTGTCAGCTATTTCATTACATTAAATTACTTAACCCTCATTAATCTATGATCAATATTTTCCATAGCATAATATTTTTCACTTAACCCTACTTTACATAGTATTAATCATGCCGTTGGTAAGAAATCATCAATAATCTCCTGAATGAAAAAAATTGTACGGTTTGTGGTACATTACTGT…
GcRUN132	Galeocerdo cuvier	143	143	101	101	127	127	199	199	117	123	122	122	118	122	207	215	TTATAGTACGTAAAACCAAAAGTGAAAAATTTTGGTTTTTGTACGTCAGTATGACATATTAATGATATGGCCCACATATCCTAATATACCACATACAACCCTCATTCCCTGGGTTACTTTAACAGATAATCCCCTACAGTTTCACATATACTATGTTTAATACTCATTAATCGATATTCCCCTATATCATTACATACTATGTTTAATCCACATTAGTTTACTGTCAGCTATTTCATTACATTAAATTACTTAACCCTCATTAATCTATGATCAATATTTTCCATAGCATAATATTTTTCACTTAACCCTACTTTACATAGTATTAATCATGCCGTTGGTAAGAAATCACCAATAACCTCCTGAATGAAAAAAATTGTACGGTTTGTGGTACATTACTGT…
GcRUN133	Galeocerdo cuvier	143	143	97	101	127	129	195	199	117	123	122	122	114	118	215	215	TTATAGTACGTAAAACCAAAAGTGAAAAATTTTGGTTTTTGTACGTCAGTATGACATATTAATGATATGGCCCACATATCCTAATATACCACATACAACCCTCATTCCCTGGGTTACTTTAACAGATAATCCCCTACAGTTTCACATATACTATGTTTAATACTCATTAATCGATATTCCCCTATATCATTACATACTATGTTTAATCCACATTAGTTTACTGTCAGCTATTTCATTACATTAAATTACTTAACCCTCATTAATCTATGATCAATATTTTCCATAGCATAATATTTTTCACTTAACCCTACTTTACATAGTATTAATCATGCCGTTGGTAAGAAATCACCAATAACCTCCTGAATGAAAAAAATTGTACGGTTTGTGGTACATTACTGT…
GcRUN134	Galeocerdo cuvier	143	143	101	101	127	129	199	199	117	123	122	122	118	122	207	215	TTATAGTACGTAAAACCAAAAGTGAAAAATTTTGGTTTTTGTACGTCAGTATGACATATTAATGATATGGCCCACATATCCTAATATACCACATACAACCCTCATTCCCTGGGTTACTTTAACAGATAATCCCCTACAGTTTCACATATACTATGTTTAATACTCATTAATCGATATTCCCCTATATCATTACATACTATGTTTAATCCACATTAGTTTACTGTCAGCTATTTCATTACATTAAATTACTTAACCCTCATTAATCTATGATCAATATTTTCCATAGCATAATATTTTTCACTTAACCCTACTTTACATAGTATTAATCATGCCGTTGGTAAGAAATCACCAATAACCTCCTGAATGAAAAAAATTGTACGGTTTGTGGTACATTACTGT…
GcRUN135	Galeocerdo cuvier	143	143	101	101	129	129	199	199	117	123	122	122	114	116	207	207	TTATAGTACGTAAAACCAAAAGTGAAAAATTTTGGTTTTTGTACGTCAGTATGACATATTAATGATATGGCCCACATATCCTAATATACCACATACAACCCTCATTCCCTGGGTTACTTTAACAGATAATCCCCTACAGTTTCACATATACTATGTTTAATACTCATTAATCGATATTCCCCTATATCATTACATACTATGTTTAATCCACATTAGTTTACTGTCAGCTATTTCATTACATTAAATTACTTAACCCTCATTAATCTATGATCAATATTTTCCATAGCATAATATTTTTCACTTAACCCTACTTTACATAGTATTAATCATGCCGTTGGTAAGAAATCACCAATAACCTCCTGAATGAAAAAAATTGTACGGTTTGTGGTACATTACTGT…
GcRUN136	Galeocerdo cuvier	143	143	101	101	127	129	199	199	117	123	122	122	122	122	207	207	TTATAGTACGTAAAACCAAAAGTGAAAAATTTTGGTTTTTGTACGTCAGTATGACATATTAATGATATGGCCCACATATCCTAATATACCACATACAACCCTCATTCCCTGGGTTACTTTAACAGATAATCCCCTACAGTTTCACATATACTATGTTTAATACTCATTAATCGATATTCCCCTATATCATTACATACTATGTTTAATCCACATTAGTTTACTGTCAGCTATTTCATTACATTAAATTACTTAACCCTCATTAATCTATGATCAATATTTTCCATAGCATAATATTTTTCACTTAACCCTACTTTACATAGTATTAATCATGCCGTTGGTAAGAAATCACCAATAACCTCCTGAATGAAAAAAATTGTACGGTTTGTGGTACATTACTGT…
GcRUN137	Galeocerdo cuvier	143	147	101	101	127	127	199	199	117	123	118	122	122	122	207	207	TTATAGTACGTAAAACCAAAAGTGAAAAATTTTGGTTTTTGTACGTCAGTATGACATATTAATGATATGGCCCACATATCCTAATATACCACATACAACCCTCATTCCCTGGGTTACTTTAACAGATAATCCCCTACAGTTTCACATATACTATGTTTAATACTCATTAATCGATATTCCCCTATATCATTACATACTATGTTTAATCCACATTAGTTTACTGTCAGCTATTTCATTACATTAAATTACTTAACCCTCATTAATCTATGATCAATATTTTCCATAGCATAATATTTTTCACTTAACCCTACTTTACATAGTATTAATCATGCCGTTGGTAAGAAATCACCAATAACCTCCTGAATGAAAAAAATTGTACGGTTTGTGGTACATTACTGT…
GcRUN138	Galeocerdo cuvier	143	143	101	101	121	127	199	199	117	117	122	122	118	122	207	215	TTATAGTACGTAAAACCAAAAGTGAAAAATTTTGGTTTTTGTACGTCAGTATGACATATTAATGATATGGCCCACATATCCTAATATACCACATACAACCCTCATTCCCTGGGTTACTTTAACAGATAATCCCCTACAGTTTCACATATACTATGTTTAATACTCATTAATCGATATTCCCCTATATCATTACATACTATGTTTAATCCACATTAGTTTACTGTCAGCTATTTCATTACATTAAATTACTTAACCCTCATTAATCTATGATCAATATTTTCCATAGCATAATATTTTTCACTTAACCCTACTTTACATAGTATTAATCATGCCGTTGGTAAGAAATCACCAATAATCTCCTGAATGAAAAAAATTGTACGGTTTGTGGTACATTACTGT…
GcRUN139	Galeocerdo cuvier	143	143	101	101	127	129	199	199	117	117	118	122	114	128	207	215	TTATAGTACGTAAAACCAAAAGTGAAAAATTTTGGTTTTTGTACGTCAGTATGACATATTAATGATATGGCCCACATATCCTAATATACCACATACAACCCTCATTCCCTGGGTTACTTTAACAGATAATCCCCTACAGTTTCACATATACTATGTTTAATACTCATTAATCGATATTCCCCTATATCATTACATACTATGTTTAATCCACATTAGTTTACTGTCAGCTATTTCATTACATTAAATTACTTAACCCTCATTAATCTATGATCAATATTTTCCATAGCATAATATTTTTCACTTAACCCTACTTTACATAGTATTAATCATGCCGTTGGTAAGAAATCACCAATAACCTCCTGAATGAAAAAAATTGTACGGTTTGTGGTACATTACTGT…
GcRUN140	Galeocerdo cuvier	143	143	101	101	127	127	195	199	117	117	122	122	118	120	207	207	TTATAGTACGTAAAACCAAAAGTGAAAAATTTTGGTTTTTGTACGTCAGTATGACATATTAATGATATGGCCCACATATCCTAATATACCACATACAACCCTCATTCCCTGGGTTACTTTAACAGATAATCCCCTACAGTTTCACATATACTATGTTTAATACTCATTAATCGATATTCCCCTATATCATTACATACTATGTTTAATCCACATTAGTTTACTGTCAGCTATTTCATTACATTAAATTACTTAACCCTCATTAATCTATGATCAATATTTTCCATAGCATAATATTTTTCACTTAACCCTACTTTACATAGTATTAATCATGCCGTTGGTAAGAAATCACCAATAATCTCCTGAATGAAAAAAATTGTACGGTTTGTGGTACATTACTGT…
GcRUN141	Galeocerdo cuvier	143	143	101	101	127	129	199	199	123	123	122	122	114	120	207	215	TTATAGTACGTAAAACCAAAAGTGAAAAATTTTGGTTTTTGTACGTCAGTATGACATATTAATGATATGGCCCACATATCCTAATATACCACATACAACCCTCATTCCCTGGGTTACTTTAACAGATAATCCCCTACAGTTTCACATATACTATGTTTAATACTCATTAATCGATATTCCCCTATATCATTACATACTATGTTTAATCCACATTAGTTTACTGTCAGCTATTTCATTACATTAAATTACTTAACCCTCATTAATCTATGATCAATATTTTCCATAGCATAATATTTTTCACTTAACCCTACTTTACATAGTATTAATCATGCCGTTGGTAAGAAATCACCAATAACCTCCTGAATGAAAAAAATTGTACGGTTTGTGGTACATTACTGT…
GcRUN142	Galeocerdo cuvier	143	143	101	101	121	129	195	199	117	117	122	122	116	120	207	207	TTATAGTACGTAAAACCAAAAGTGAAAAATTTTGGTTTTTGTACGTCAGTATGACATATTAATGATATGGCCCACATATCCTAATATACCACATACAACCCTCATTCCCTGGGTTACTTTAACAGATAATCCCCTACAGTTTCACATATACTATGTTTAATACTCATTAATCGATATTCCCCTATATCATTACATACTATGTTTAATCCACATTAGTTTACTGTCAGCTATTTCATTACATTAAATTACTTAACCCTCATTAATCTATGATCAATATTTTCCATAGCATAATATTTTTCACTTAACCCTACTTTACATAGTATTAATCATGCCGTTGGTAAGAAATCACCAATAACCTCCTGAATGAAAAAAATTGTACGGTTTGTGGTACATTACTGT…
GcRUN143	Galeocerdo cuvier	143	143	93	101	121	127	199	199	117	123	122	122	114	118	207	207	TTATAGTACGTAAAACCAAAAGTGAAAAATTTTGGTTTTTGTACGTCAGTATGACATATTAATGATATGGCCCACATATCCTAATATACCACATACAACCCTCATTCCCTGGGTTACTTTAACAGATAATCCCCTACAGTTTCACATATACTATGTTTAATACTCATTAATCGATATTCCCCTATATCATTACATACTATGTTTAATCCACATTAGTTTACTGTCAGCTATTTCATTACATTAAATTACTTAACCCTCATTAATCTATGATCAATATTTTCCATAGCATAATATTTTTCACTTAACCCTACTTTACATAGTATTAATCATGCCGTTGGTAAGAAATCACCAATAACCTCCTGAATGAAAAAAATTGTACGGTTTGTGGTACATTACTGT…
GcRUN144	Galeocerdo cuvier	143	147	101	101	127	129	195	199	117	117	122	122	122	122	207	207	TTATAGTACGTAAAACCAAAAGTGAAAAATTTTGGTTTTTGTACGTCAGTATGACATATTAATGATATGGCCCACATATCCTAATATACCACATACAACCCTCATTCCCTGGGTTACTTTAACAGATAATCCCCTACAGTTTCACATATACTATGTTTAATACTCATTAATCGATATTCCCCTATATCATTACATACTATGTTTAATCCACATTAGTTTACTGTCAGCTATTTCATTACATTAAATTACTTAACCCTCATTAATCTATGATCAATATTTTCCATAGCATAATATTTTTCACTTAACCCTACTTTACATAGTATTAATCATGCCGTTGGTAAGAAATCACCAATAACCTCCTGAATGAAAAAAATTGTACGGTTTGTGGTACATTACTGT…
GcRUN145	Galeocerdo cuvier	143	143	101	101	121	127	195	199	117	123	118	122	114	118	207	215	TTATAGTACGTAAAACCAAAAGTGAAAAATTTTGGTTTTTGTACGTCAGTATGACATATTAATGATATGGCCCACATATCCTAATATACCACATACAACCCTCATTCCCTGGGTTACTTTAACAGATAATCCCCTACAGTTTCACATATACTATGTTTAATACTCATTAATCGATATTCCCCTATATCATTACATACTATGTTTAATCCACATTAGTTTACTGTCAGCTATTTCATTACATTAAATTACTTAACCCTCATTAATCTATGATCAATATTTTCCATAGCATAATATTTTTCACTTAACCCTACTTTACATAGTATTAATCATGCCGTTGGTAAGAAATCACCAATAACCTCCTGAATGAAAAAAATTGTACGGTTTGTGGTACATTACTGT…
ClRUN002	Carcharhinus leucas	136	136	-	-	-	-	-	-	-	-	-	-	-	-	-	-	-
ClRUN003	Carcharhinus leucas	136	140	-	-	-	-	-	-	-	-	-	-	-	-	-	-	-
ClRUN004	Carcharhinus leucas	136	136	-	-	-	-	-	-	-	-	-	-	-	-	-	-	-
ClRUN005	Carcharhinus leucas	136	136	-	-	-	-	-	-	-	-	-	-	-	-	-	-	-
ClRUN006	Carcharhinus leucas	136	136	-	-	-	-	-	-	-	-	-	-	-	-	-	-	-
ClRUN007	Carcharhinus leucas	136	136	-	-	-	-	-	-	-	-	-	-	-	-	-	-	-
ClRUN008	Carcharhinus leucas	136	136	-	-	-	-	-	-	-	-	-	-	-	-	-	-	-
ClRUN009	Carcharhinus leucas	136	136	-	-	-	-	-	-	-	-	-	-	-	-	-	-	-
ClRUN010	Carcharhinus leucas	136	136	-	-	-	-	-	-	-	-	-	-	-	-	-	-	-
ClRUN012	Carcharhinus leucas	136	136	-	-	-	-	-	-	-	-	-	-	-	-	-	-	-
ClRUN013	Carcharhinus leucas	136	136	-	-	-	-	-	-	-	-	-	-	-	-	-	-	-
ClRUN015	Carcharhinus leucas	136	136	-	-	-	-	-	-	-	-	-	-	-	-	-	-	-
ClRUN016	Carcharhinus leucas	136	136	-	-	-	-	-	-	-	-	-	-	-	-	-	-	-
ClRUN017	Carcharhinus leucas	136	136	-	-	-	-	-	-	-	-	-	-	-	-	-	-	-
ClRUN018	Carcharhinus leucas	136	136	-	-	-	-	-	-	-	-	-	-	-	-	-	-	-
ClRUN019	Carcharhinus leucas	136	136	-	-	-	-	-	-	-	-	-	-	-	-	-	-	-
ClRUN020	Carcharhinus leucas	136	136	-	-	-	-	-	-	-	-	-	-	-	-	-	-	-
ClRUN021	Carcharhinus leucas	136	136	-	-	-	-	-	-	-	-	-	-	-	-	-	-	-
ClRUN022	Carcharhinus leucas	136	136	-	-	-	-	-	-	-	-	-	-	-	-	-	-	-
ClRUN026	Carcharhinus leucas	136	136	-	-	-	-	-	-	-	-	-	-	-	-	-	-	-
ClRUN028	Carcharhinus leucas	136	136	-	-	-	-	-	-	-	-	-	-	-	-	-	-	-
ClRUN029	Carcharhinus leucas	136	136	-	-	-	-	-	-	-	-	-	-	-	-	-	-	-
ClRUN031	Carcharhinus leucas	136	136	-	-	-	-	-	-	-	-	-	-	-	-	-	-	-
ClRUN032	Carcharhinus leucas	136	136	-	-	-	-	-	-	-	-	-	-	-	-	-	-	-
ClRUN033	Carcharhinus leucas	136	136	-	-	-	-	-	-	-	-	-	-	-	-	-	-	-
ClRUN034	Carcharhinus leucas	136	142	-	-	-	-	-	-	-	-	-	-	-	-	-	-	-
ClRUN046	Carcharhinus leucas	136	136	-	-	-	-	-	-	-	-	-	-	-	-	-	-	-
ClRUN047	Carcharhinus leucas	136	136	-	-	-	-	-	-	-	-	-	-	-	-	-	-	-
ClRUN049	Carcharhinus leucas	136	136	-	-	-	-	-	-	-	-	-	-	-	-	-	-	-
ClRUN050	Carcharhinus leucas	136	140	-	-	-	-	-	-	-	-	-	-	-	-	-	-	-
ClRUN051	Carcharhinus leucas	136	136	-	-	-	-	-	-	-	-	-	-	-	-	-	-	-
ClRUN052	Carcharhinus leucas	136	136	-	-	-	-	-	-	-	-	-	-	-	-	-	-	-
ClRUN053	Carcharhinus leucas	136	136	-	-	-	-	-	-	-	-	-	-	-	-	-	-	-
ClRUN054	Carcharhinus leucas	136	136	-	-	-	-	-	-	-	-	-	-	-	-	-	-	-
ClRUN056	Carcharhinus leucas	136	136	-	-	-	-	-	-	-	-	-	-	-	-	-	-	-
ClRUN057	Carcharhinus leucas	136	140	-	-	-	-	-	-	-	-	-	-	-	-	-	-	-
ClRUN058	Carcharhinus leucas	136	136	-	-	-	-	-	-	-	-	-	-	-	-	-	-	-
ClRUN059	Carcharhinus leucas	136	136	-	-	-	-	-	-	-	-	-	-	-	-	-	-	-
ClRUN060	Carcharhinus leucas	136	136	-	-	-	-	-	-	-	-	-	-	-	-	-	-	-
ClRUN062	Carcharhinus leucas	136	136	-	-	-	-	-	-	-	-	-	-	-	-	-	-	-
ClRUN063	Carcharhinus leucas	136	136	-	-	-	-	-	-	-	-	-	-	-	-	-	-	-
CbRUN001	Carcharhinus brevipinna	139	139	-	-	-	-	198	198	159	159	-	-	-	-	222	222	-
CbRUN002	Carcharhinus brevipinna	139	139	-	-	-	-	198	198	159	159	-	-	-	-	222	222	-
CpRUN001	Carcharhinus plumbeus	135	135	-	-	-	-	-	-	105	105	114	116	-	-	-	-	-
CpRUN002	Carcharhinus plumbeus	135	135	101	101	-	-	194	200	105	105	114	116	-	-	-	-	-
CpRUN003	Carcharhinus plumbeus	135	135	99	101	-	-	194	194	-	-	112	116	-	-	-	-	-
SlRUN001	Sphyrna lewini	156	156	-	-	-	-	-	-	-	-	-	-	179	181	-	-	-
SlRUN002	Sphyrna lewini	154	156	-	-	-	-	-	-	-	-	-	-	173	185	-	-	-
SlRUN003	Sphyrna lewini	152	156	-	-	-	-	-	-	-	-	-	-	179	181	-	-	-
SlRUN004	Sphyrna lewini	154	156	-	-	-	-	-	-	-	-	-	-	181	181	-	-	-
